# Supplementary material for: Power and carbon monoxide co-production by a proton-conducting solid oxide fuel cell with La0.6Sr0.2Cr0.85Ni0.15O3−δ for on-cell dry reforming of CH4 by CO2
Source: Royal Society of Chemistry journal article supplement (doi:10.1039/d0ta03458d), 2020-01-01
Supplement: d0ta03458d1.pdf [file d0ta03458d1.pdf]

## Electronic Supplementary Information

### **Power and carbon monoxide co-production by a proton-conducting solid oxide fuel cell with $\text{La}_{0.6}\text{Sr}_{0.2}\text{Cr}_{0.85}\text{Ni}_{0.15}\text{O}_{3-\delta}$ for on-cell dry reforming of $\text{CH}_4$ by $\text{CO}_2$**

Tong Wei<sup>‡a</sup>, Peng Qiu<sup>‡a, b</sup>, Lichao Jia<sup>a\*</sup>, Yuan Tan<sup>c</sup>, Xin Yang<sup>b</sup>, Shichen Sun<sup>b</sup>, Fanglin Chen<sup>b\*</sup> and Jian Li<sup>a</sup>

*a Center for Fuel Cell Innovation, School of Materials Science and Engineering, State Key Lab of Material Processing and Die & Mould Technology, Huazhong University of Science and Technology, Wuhan, 430074, China.*

*\* E-mail: jialc@hust.edu.cn*

*b Department of Mechanical Engineering, University of South Carolina, Columbia, SC, 29208, United States.*

*\* E-mail: chenfa@cec.sc.edu*

*c School of Physics and Information Engineering, The Key Laboratory of Optoelectronic Chemical Materials and Devices, Jiangnan University, Wuhan 430056, China.*

*‡ These authors contributed equally.*

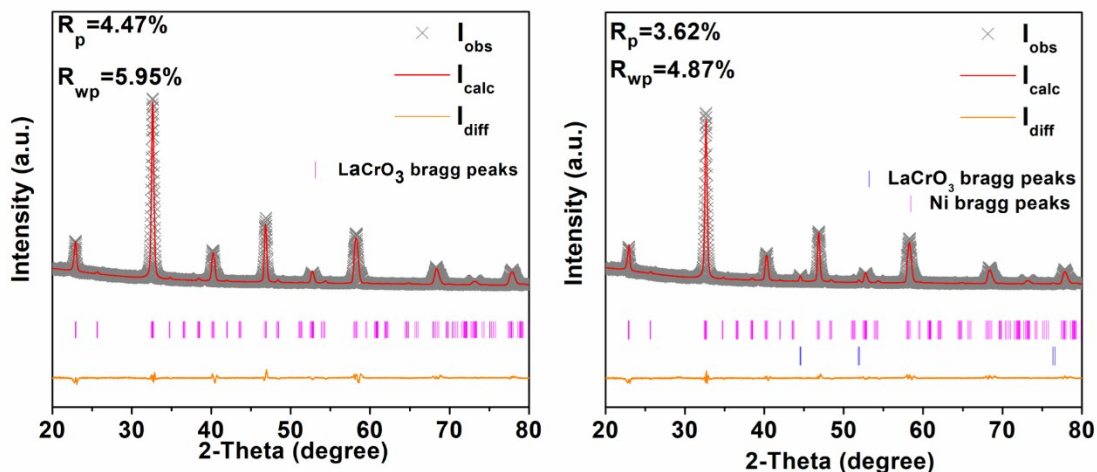

Fig. S1 Rietveld refinement for XRD patterns of (a) LSCrN and (b) reduced LSCrN.

Table S1 Structure parameters for LSCrN and reduced LSCrN powders obtained by the Rietveld refinement.

|                       |              | Before reduction                                                           | After reduction                                                                           |                   |
|-----------------------|--------------|----------------------------------------------------------------------------|-------------------------------------------------------------------------------------------|-------------------|
|                       |              | $\text{La}_{0.6}\text{Sr}_{0.2}\text{Cr}_{0.85}\text{Ni}_{0.15}\text{O}_3$ | $\text{La}_{0.683}\text{Sr}_{0.228}\text{Cr}_{0.968}\text{Ni}_{0.032}\text{O}_{3-\delta}$ | Ni                |
| Space group           |              | <i>Pbnm</i> (62)                                                           | <i>Pbnm</i> (62)                                                                          | <i>Fm3m</i> (225) |
| Unite-cell parameters | <i>a</i> (Å) | 5.4633(9)                                                                  | 5.4737(7)                                                                                 | 3.5300(7)         |
|                       | <i>b</i> (Å) | 7.7684(0)                                                                  | 7.7791(1)                                                                                 | 3.5300(7)         |
|                       | <i>c</i> (Å) | 5.5063(8)                                                                  | 5.5123(9)                                                                                 | 3.5300(7)         |
| Reliability factors   | $R_p$ (%)    | 4.12                                                                       | 3.42                                                                                      |                   |
|                       | $R_{wp}$ (%) | 5.95                                                                       | 4.87                                                                                      |                   |
|                       | $\chi^2$     | 2.57                                                                       | 3.12                                                                                      |                   |

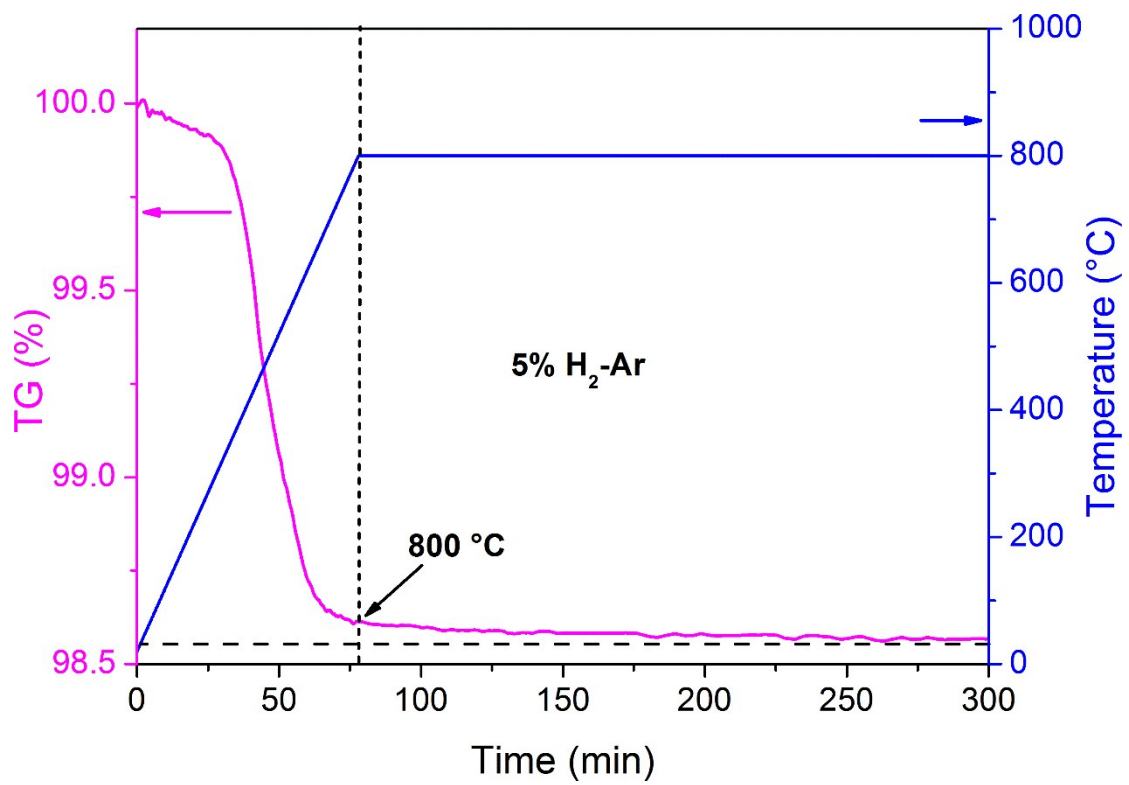

**Fig. S2** Thermogravimetric analysis of LSCrN powder in 5% H<sub>2</sub>-Ar up to and held at 800 °C.

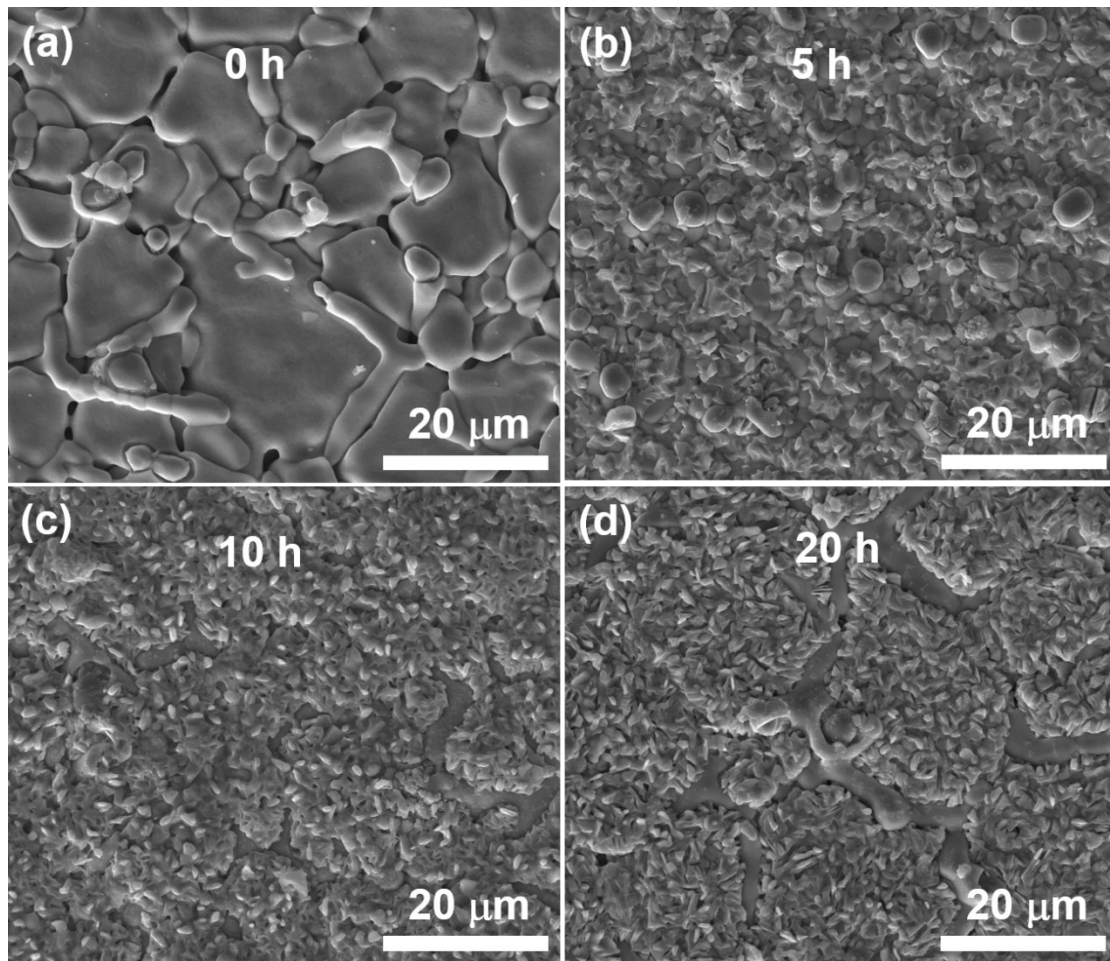

**Fig. S3** Microstructure of BZCYYb discs heat-treated in CO<sub>2</sub> at 700 °C for (a) 0 h, (b) 5 h, (c) 10 h and 20 h (d), respectively.

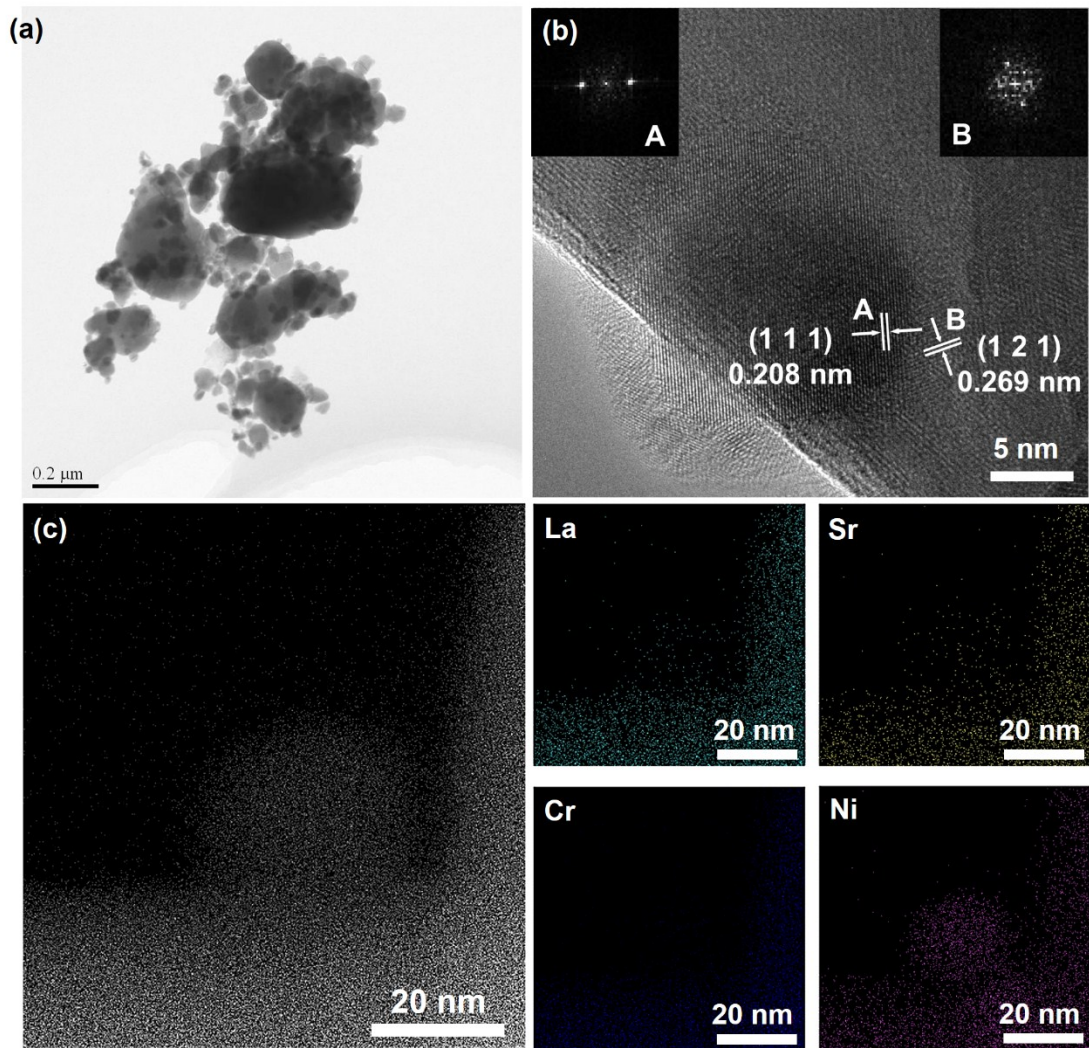

Fig. S4 TEM examination of LSCrN reduced in H<sub>2</sub> at 800 °C for 4 h: (a) Low magnification image; (b) High magnification image; (c) elemental mapping.

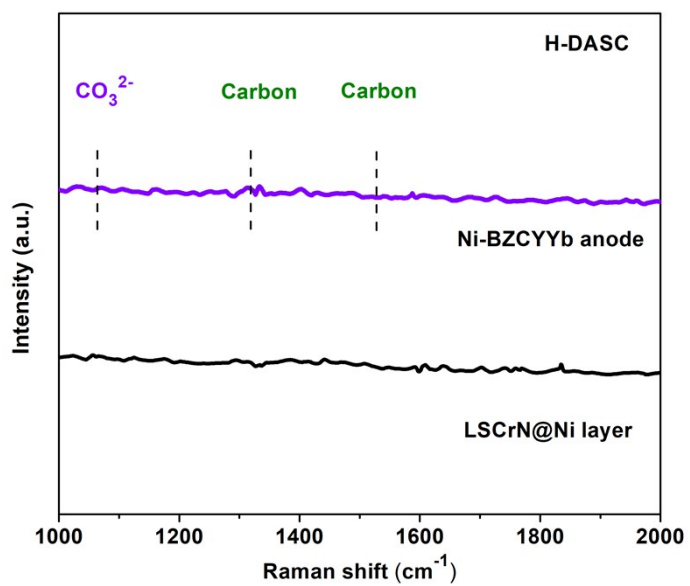

Fig. S5 Raman spectra taken at Ni-BZCYYb anode and LSCrN@Ni layer of H-DASC after stability test in CO<sub>2</sub>-CH<sub>4</sub> at 700 °C and 0.6 A cm<sup>-2</sup> for 65 h.
